# Supplementary material for: Heat shock proteins create a signature to predict the clinical outcome in breast cancer
Source: PubMed Central journal article supplement (PMC6525249; doi:10.1038/s41598-019-43556-1), 2019-05-17
Supplement: 41598_2019_43556_MOESM1_ESM.pdf [file 41598_2019_43556_MOESM1_ESM.pdf]

## Supplementary Information

### Heat shock proteins create a signature to predict the clinical outcome in breast cancer

**Marta Klimczak<sup>1,2\*</sup>, Przemysław Biecek<sup>3,4</sup>, Alicja Zylicz<sup>1</sup>, Maciej Zylicz<sup>1\*</sup>**

<sup>1</sup>International Institute of Molecular and Cell Biology, Warsaw, Poland

<sup>2</sup>Postgraduate School of Molecular Medicine, Medical University of Warsaw, Warsaw, Poland

<sup>3</sup>Faculty of Mathematics, Informatics, and Mechanics, University of Warsaw, Warsaw, Poland

<sup>4</sup>Faculty of Mathematics and Information Science, Warsaw University of Technology, Warsaw, Poland

\*Correspondence and requests for materials should be addressed to M.K. and M.Z. (email: [mklimczak@iimcb.gov.pl](mailto:mklimczak@iimcb.gov.pl); [mzylicz@iimcb.gov.pl](mailto:mzylicz@iimcb.gov.pl)).

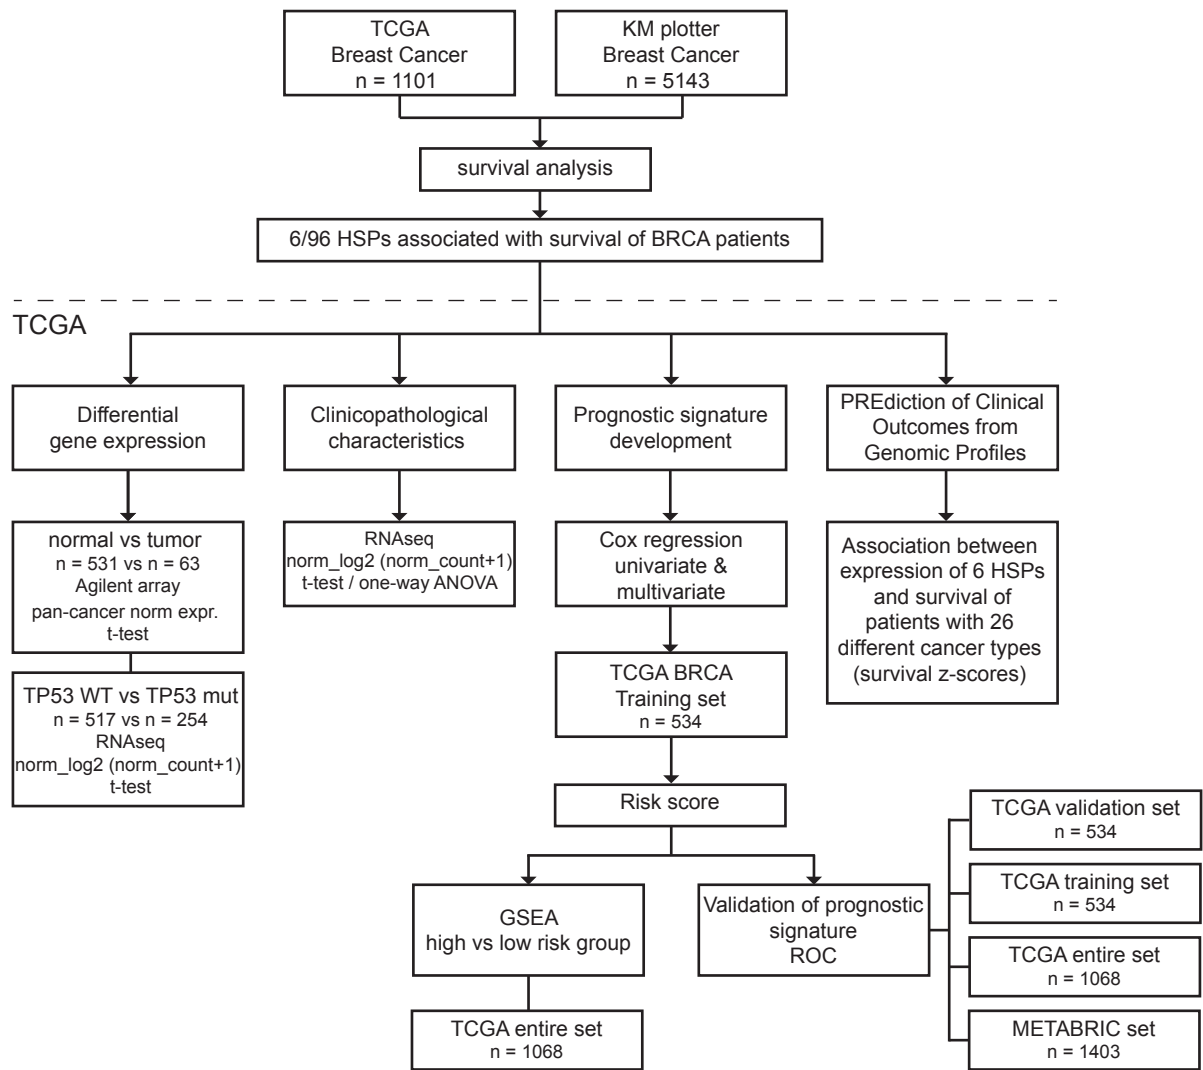

**Supplementary Fig. S1.** Workflow of the present study.

| Gene     | Coefficient  | Coefficient SE | P-value       |
|----------|--------------|----------------|---------------|
| CCT1     | <b>0,52</b>  | <b>0,13</b>    | <b>0,0001</b> |
| DNAJC23  | <b>0,42</b>  | <b>0,12</b>    | <b>0,0005</b> |
| HSPA9    | <b>0,54</b>  | <b>0,16</b>    | <b>0,0007</b> |
| HSP90AA1 | <b>0,38</b>  | <b>0,11</b>    | <b>0,0009</b> |
| HSPA8    | <b>0,41</b>  | <b>0,13</b>    | <b>0,0012</b> |
| DNAJB5   | <b>-0,30</b> | <b>0,11</b>    | <b>0,0064</b> |
| HSPA2    | <b>-0,13</b> | <b>0,05</b>    | <b>0,0065</b> |
| HSPH1    | <b>0,26</b>  | <b>0,10</b>    | <b>0,0130</b> |
| CCT4     | <b>0,39</b>  | <b>0,16</b>    | <b>0,0140</b> |
| DNAJC13  | <b>0,39</b>  | <b>0,16</b>    | <b>0,0160</b> |
| HSCB     | <b>-0,29</b> | <b>0,13</b>    | <b>0,0330</b> |
| DNAJC30  | <b>-0,31</b> | <b>0,15</b>    | <b>0,0360</b> |
| CCT5     | <b>0,25</b>  | <b>0,12</b>    | <b>0,0440</b> |
| CCT2     | <b>0,24</b>  | <b>0,12</b>    | <b>0,0460</b> |
| DNAJC4   | <b>-0,22</b> | <b>0,11</b>    | <b>0,0500</b> |
| CCT8     | 0,29         | 0,16           | 0,0630        |
| HSPD1    | 0,21         | 0,12           | 0,0720        |
| HSP90AB1 | 0,24         | 0,13           | 0,0740        |
| HSPB8    | 0,07         | 0,04           | 0,0760        |
| HSPA4    | 0,28         | 0,16           | 0,0770        |
| DNAJA2   | 0,24         | 0,14           | 0,0850        |
| DNAJB13  | -0,12        | 0,08           | 0,1100        |
| CCT7     | 0,28         | 0,18           | 0,1200        |
| DNAJB12  | -0,30        | 0,19           | 0,1300        |
| DNAJC6   | 0,07         | 0,05           | 0,1500        |
| HSPA14   | 0,16         | 0,13           | 0,2000        |
| DNAJB8   | 0,56         | 0,44           | 0,2000        |
| DNAJC5   | 0,19         | 0,15           | 0,2000        |
| HSPA7    | -0,07        | 0,06           | 0,2100        |
| HSPA13   | 0,13         | 0,10           | 0,2100        |
| HSPE1    | 0,15         | 0,12           | 0,2100        |
| DNAJB14  | 0,14         | 0,11           | 0,2100        |
| DNAJC14  | 0,26         | 0,21           | 0,2100        |
| DNAJC12  | -0,04        | 0,03           | 0,2400        |
| HSPB4    | 0,14         | 0,12           | 0,2500        |
| HSPB11   | -0,15        | 0,13           | 0,2500        |
| DNAJB7   | -0,12        | 0,11           | 0,2500        |
| DNAJC1   | -0,09        | 0,08           | 0,2500        |
| DNAJC22  | 0,05         | 0,04           | 0,2500        |
| DNAJA4   | 0,09         | 0,08           | 0,2600        |
| HSPA6    | -0,07        | 0,07           | 0,2700        |
| DNAJC11  | 0,22         | 0,21           | 0,2800        |
| DNAJC21  | 0,20         | 0,19           | 0,2800        |
| CCT3     | 0,15         | 0,14           | 0,3000        |
| DNAJC28  | -0,12        | 0,11           | 0,3100        |
| DNAJC3   | 0,13         | 0,13           | 0,3200        |
| DNAJC19  | -0,14        | 0,14           | 0,3200        |
| DNAJC17  | -0,11        | 0,12           | 0,3300        |

| Gene    | Coefficient | Coefficient SE | P-value |
|---------|-------------|----------------|---------|
| HSPB3   | 0,07        | 0,07           | 0,3600  |
| HSPB5   | -0,04       | 0,04           | 0,3600  |
| DNAJC15 | -0,09       | 0,10           | 0,3600  |
| DNAJC2  | -0,14       | 0,15           | 0,3700  |
| DNAJC16 | -0,13       | 0,15           | 0,3800  |
| CCT6A   | 0,11        | 0,13           | 0,3900  |
| DNAJC27 | 0,13        | 0,16           | 0,4000  |
| HSPB2   | -0,05       | 0,06           | 0,4100  |
| DNAJB4  | 0,08        | 0,10           | 0,4200  |
| HYOU1   | 0,09        | 0,12           | 0,4400  |
| HSPA12B | -0,05       | 0,07           | 0,4500  |
| DNAJB3  | 0,15        | 0,22           | 0,5000  |
| DNAJA3  | 0,11        | 0,17           | 0,5100  |
| HSPA4L  | 0,03        | 0,05           | 0,5200  |
| DNAJC7  | -0,11       | 0,18           | 0,5300  |
| DNAJC24 | -0,11       | 0,17           | 0,5300  |
| HSPB6   | -0,03       | 0,05           | 0,5500  |
| DNAJC25 | 0,11        | 0,18           | 0,5500  |
| DNAJB2  | 0,08        | 0,13           | 0,5600  |
| HSPB10  | -0,14       | 0,27           | 0,5900  |
| CCT6B   | -0,05       | 0,09           | 0,6000  |
| MKKS    | 0,10        | 0,19           | 0,6000  |
| HSPB7   | 0,02        | 0,05           | 0,6200  |
| DNAJC5B | -0,03       | 0,05           | 0,6200  |
| DNAJC29 | -0,04       | 0,08           | 0,6200  |
| DNAJC8  | -0,11       | 0,23           | 0,6300  |
| DNAJC26 | 0,07        | 0,15           | 0,6300  |
| BBS12   | -0,06       | 0,12           | 0,6500  |
| DNAJA1  | 0,06        | 0,15           | 0,6700  |
| DNAJB9  | 0,05        | 0,13           | 0,6800  |
| BBS10   | -0,05       | 0,13           | 0,7100  |
| HSPA12A | 0,03        | 0,08           | 0,7400  |
| DNAJB11 | -0,05       | 0,14           | 0,7400  |
| HSPA1B  | 0,03        | 0,10           | 0,7800  |
| DNAJC10 | 0,04        | 0,14           | 0,7900  |
| DNAJB6  | -0,03       | 0,16           | 0,8300  |
| HSPB1   | 0,01        | 0,06           | 0,8400  |
| HSP90L  | 0,02        | 0,12           | 0,8600  |
| HSPA1A  | 0,01        | 0,09           | 0,8900  |
| DNAJC18 | -0,02       | 0,13           | 0,8900  |
| HSP90B1 | -0,02       | 0,16           | 0,9000  |
| DNAJB1  | 0,02        | 0,15           | 0,9100  |
| HSPA1L  | -0,01       | 0,13           | 0,9200  |
| HSPB9   | 0,01        | 0,08           | 0,9200  |
| DNAJC5G | 0,03        | 0,29           | 0,9300  |
| HSPA5   | 0,01        | 0,15           | 0,9600  |
| DNAJC9  | 0,00        | 0,15           | 0,9800  |

**Supplementary Fig. S2.** Univariate Cox proportional hazards analysis of overall survival for TCGA BRCA patients based on HSP expression.

A)

## OVERALL SURVIVAL

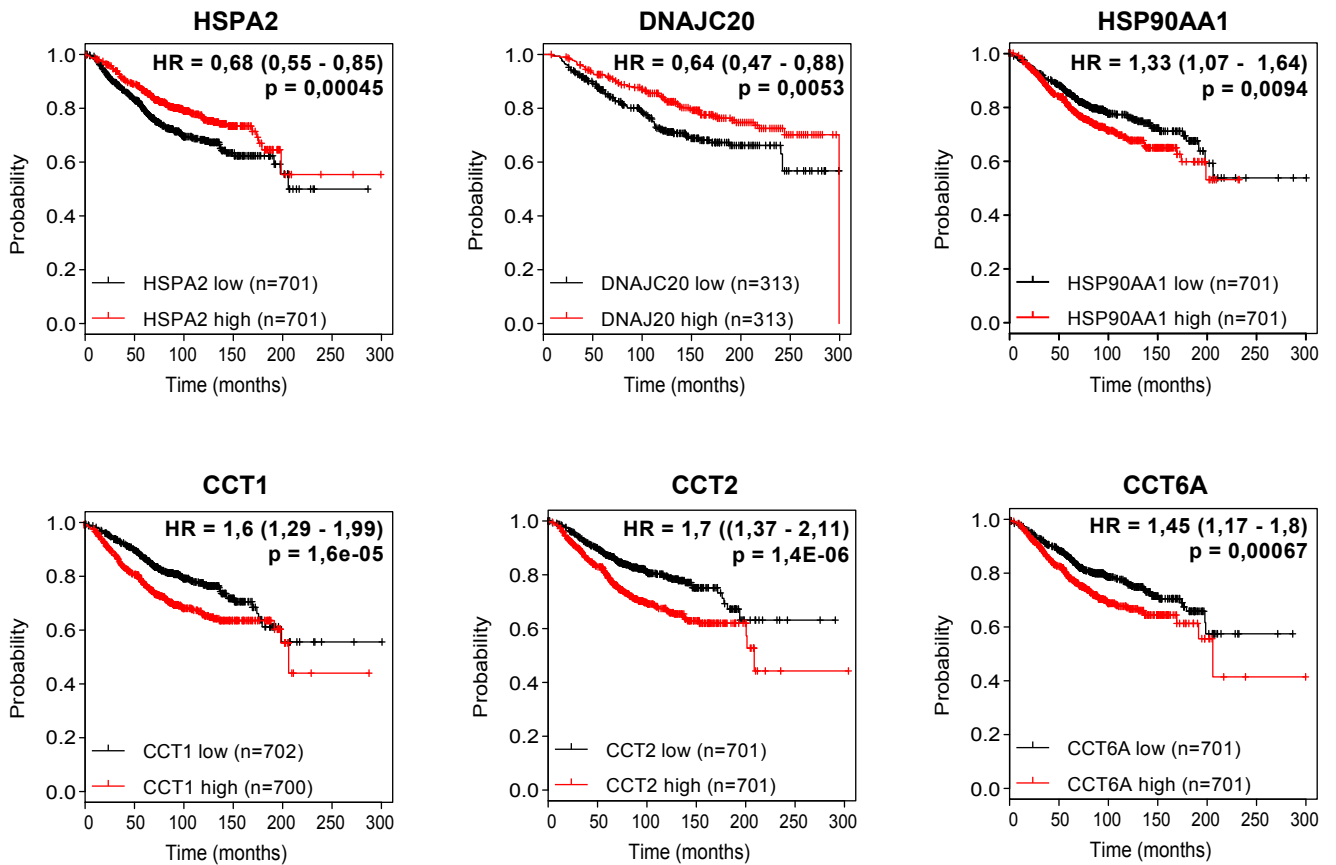

B)

## RELAPSE-FREE SURVIVAL

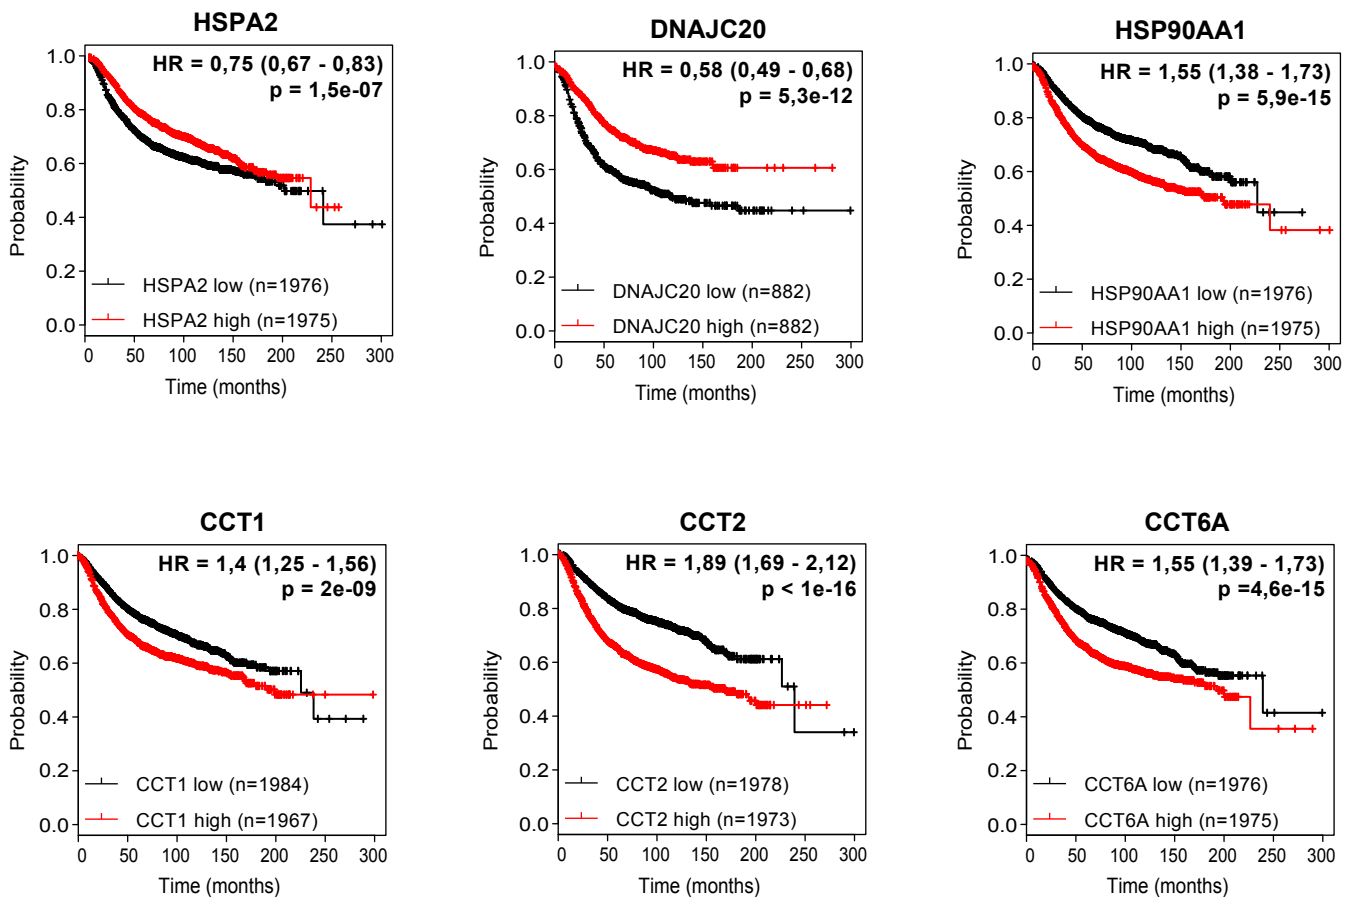

**Supplementary Fig. S3.** Expression of six identified HSPs predicts survival of breast cancer patients. Kaplan-Meier analyses of overall survival (A) and relapse-free survival (B) based on the gene expression in cohort of KM plotter patients. Hazard ratios (HR) with 95% confidence intervals and p-values (log-rank test, Mantel-Haenszel) were calculated. Data for survival curves were obtained from KM plotter (<http://kmplot.com/analysis/>).

A)

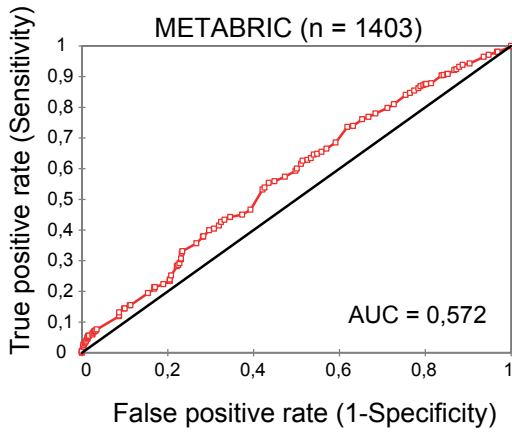

B)

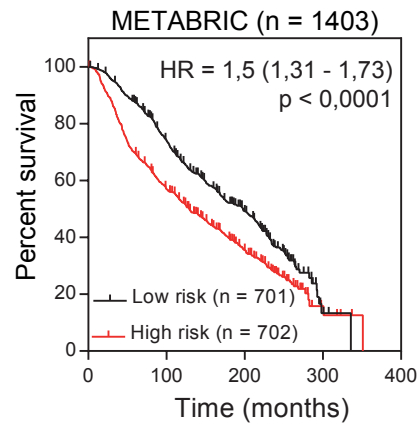

**Supplementary Fig. S4. (A)** Diagnostic value of five candidate HSPs and cancer stage in METABRIC dataset (n = 1403). The areas under curve (AUC) were calculated for ROC curves, and sensitivity and specificity were calculated to assess the score performance. **(B)** Kaplan-Meier survival curves for five-HSP and stage signature in METABRIC dataset (n = 1403). Patients were stratified into high-risk and low-risk groups based on median of risk score. Hazard ratios (HR) with 95% confidence intervals and log-rank p-values were calculated.

A)

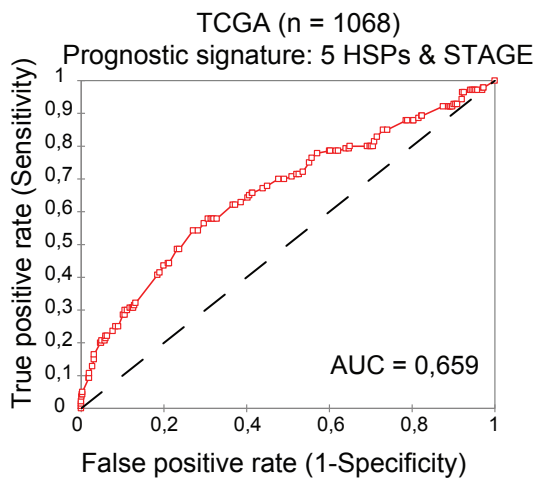

B)

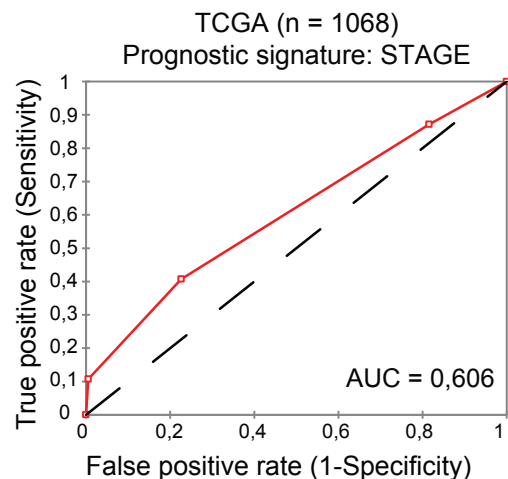

**Supplementary Fig. S5.** Comparison of signatures for survival prediction of TCGA breast cancer patients based on **A)** expression of 5 HSPs and stage, **B)** stage only. The areas under curve (AUC) were calculated for ROC curves, and sensitivity and specificity were calculated to assess the score performance.

A)

| Multivariate analysis             |             |                    |       |        |       |
|-----------------------------------|-------------|--------------------|-------|--------|-------|
| Variable                          | Coefficient | p-value            | HR    | 95% CI |       |
|                                   |             |                    |       | Lower  | Upper |
| <b>Training set (n = 534)</b>     |             |                    |       |        |       |
| HSPA2                             | -0,461      | 0,084              | 0,631 | 0,374  | 1,063 |
| DNAJC20                           | -0,180      | 0,502              | 0,835 | 0,494  | 1,413 |
| HSP90AA1                          | 0,703       | <b>0,036</b>       | 2,020 | 1,048  | 3,896 |
| CCT1                              | 0,127       | 0,661              | 1,135 | 0,644  | 2,002 |
| CCT2                              | 0,160       | 0,625              | 1,173 | 0,619  | 2,223 |
| STAGE I                           | -3,357      | <b>&lt; 0,0001</b> | 0,035 | 0,011  | 0,111 |
| STAGE II                          | -3,238      | <b>&lt; 0,0001</b> | 0,039 | 0,014  | 0,107 |
| STAGE III                         | -2,426      | <b>&lt; 0,0001</b> | 0,088 | 0,032  | 0,249 |
| <b>Validation set (n = 534)</b>   |             |                    |       |        |       |
| HSPA2                             | -0,625      | <b>0,015</b>       | 0,535 | 0,323  | 0,887 |
| DNAJC20                           | -0,064      | 0,791              | 0,938 | 0,583  | 1,509 |
| HSP90AA1                          | 0,391       | 0,146              | 1,478 | 0,873  | 2,502 |
| CCT1                              | 0,558       | <b>0,0315</b>      | 1,747 | 1,051  | 2,906 |
| CCT2                              | -0,1416     | 0,584              | 0,868 | 0,523  | 1,441 |
| STAGE I                           | -2,7548     | <b>&lt; 0,0001</b> | 0,064 | 0,025  | 0,165 |
| STAGE II                          | -2,3064     | <b>&lt; 0,0001</b> | 0,010 | 0,046  | 0,218 |
| STAGE III                         | -1,7115     | <b>&lt; 0,0001</b> | 0,180 | 0,082  | 0,397 |
| <b>Entire TCGA set (n = 1068)</b> |             |                    |       |        |       |
| HSPA2                             | -0,549      | <b>0,0025</b>      | 0,578 | 0,405  | 0,824 |
| DNAJC20                           | -0,123      | 0,492              | 0,885 | 0,624  | 1,255 |
| HSP90AA1                          | 0,509       | <b>0,014</b>       | 1,663 | 1,080  | 2,495 |
| CCT1                              | 0,401       | <b>0,035</b>       | 1,494 | 1,029  | 2,170 |
| CCT2                              | -0,0005     | 0,998              | 1,001 | 0,677  | 1,478 |
| STAGE I                           | -2,807      | <b>&lt; 0,0001</b> | 0,060 | 0,030  | 0,123 |
| STAGE II                          | -2,548      | <b>&lt; 0,0001</b> | 0,078 | 0,043  | 0,143 |
| STAGE III                         | -1,891      | <b>&lt; 0,0001</b> | 0,150 | 0,082  | 0,279 |

HR, hazard ratio; CI, confidence interval

B)

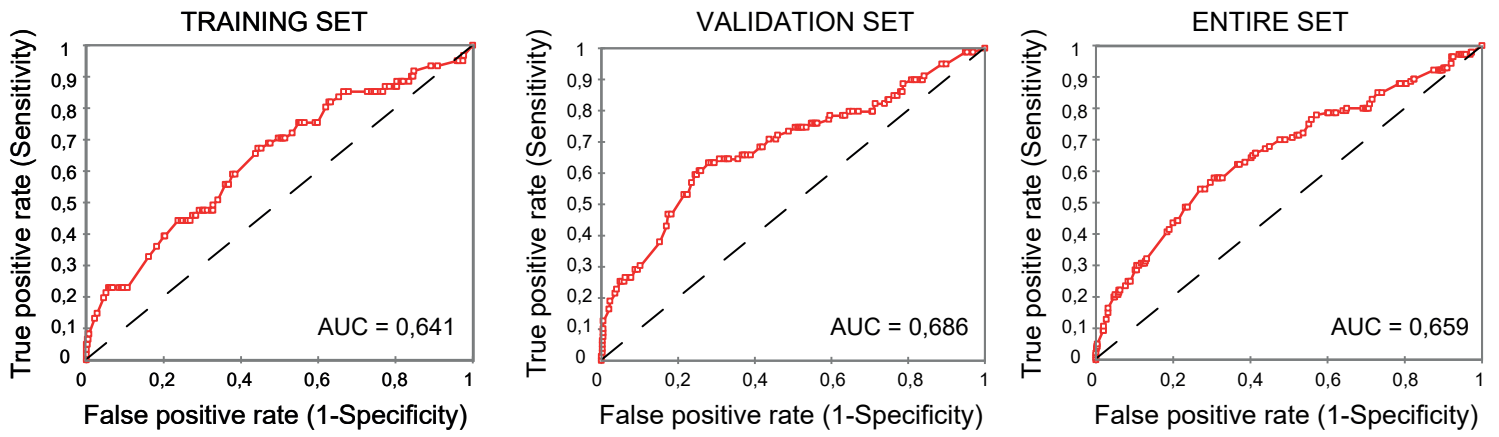

C)

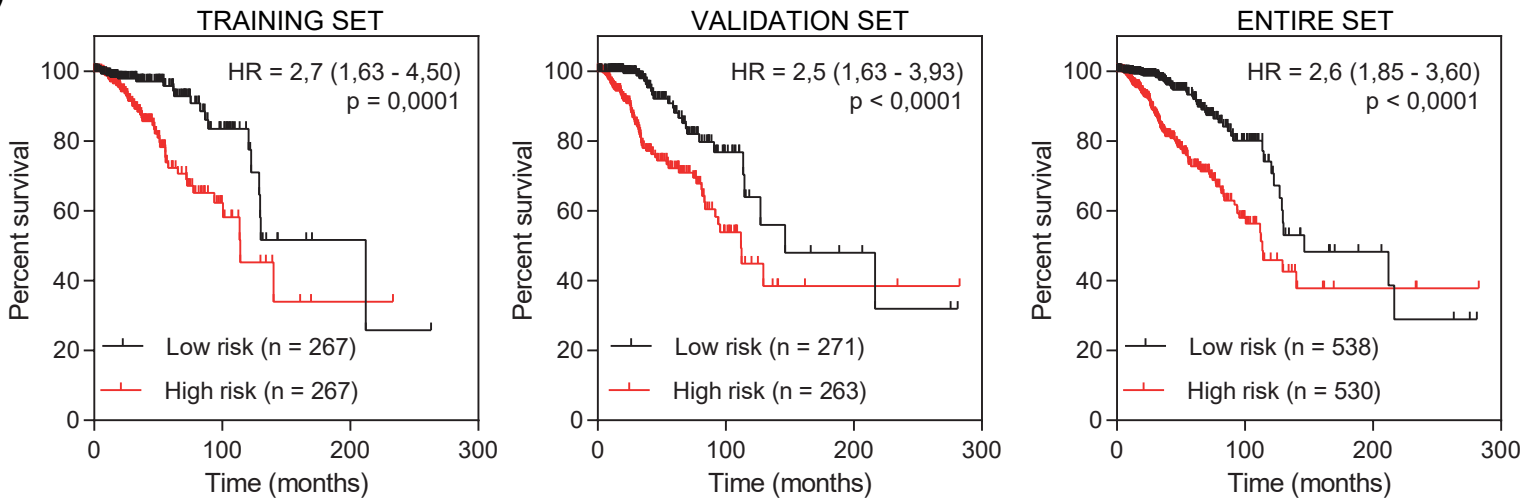

**Supplementary Fig. S6.** Survival prediction model for breast cancer patients calculated using formula with binarized Stage variables:

Risk score =  $(-0,461 \times \text{HSPA2 } 0/1) + (-0,180 \times \text{DNAJC20 } 0/1) + (0,703 \times \text{HSP90AA1 } 0/1) + (0,127 \times \text{CCT1 } 0/1)$

+  $(0,16 \times \text{CCT2 } 0/1) + (-3,357 \times \text{Stage I } 0/1) + (-3,238 \times \text{Stage II } 0/1) + (-2,426 \times \text{Stage III } 0/1)$ .

Expression data were converted to a binary format as follows: low expression = 0, high expression = 1 and stage was binarized as follows: e.g. Stage I NO = 0, YES = 1.

**(A)** Multivariate Cox proportional hazards analysis of overall survival for TCGA BRCA patients. **(B)** Diagnostic value of five candidate HSPs and cancer stage (I/II/III) in the training (n = 534), validation (n = 534) and entire TCGA BRCA dataset (n = 1068). The areas under curve (AUC) were calculated for ROC curves, and sensitivity and specificity were calculated to assess the score performance. **(C)** Kaplan-Meier survival curves for five-HSP and stage signature in the training (n = 534), validation (n = 534) and entire TCGA BRCA dataset (n = 1068). Patients were stratified into high-risk and low-risk groups based on median of risk score. Hazard ratios (HR) with 95% confidence intervals and log-rank test p-values were calculated.
